# Supplementary material
Source: PubMed Central journal article supplement (PMC7324259)
Supplement: NIHMS1598842-supplement-1.pdf [file NIHMS1598842-supplement-1.pdf]

## Supplemental Figure 1

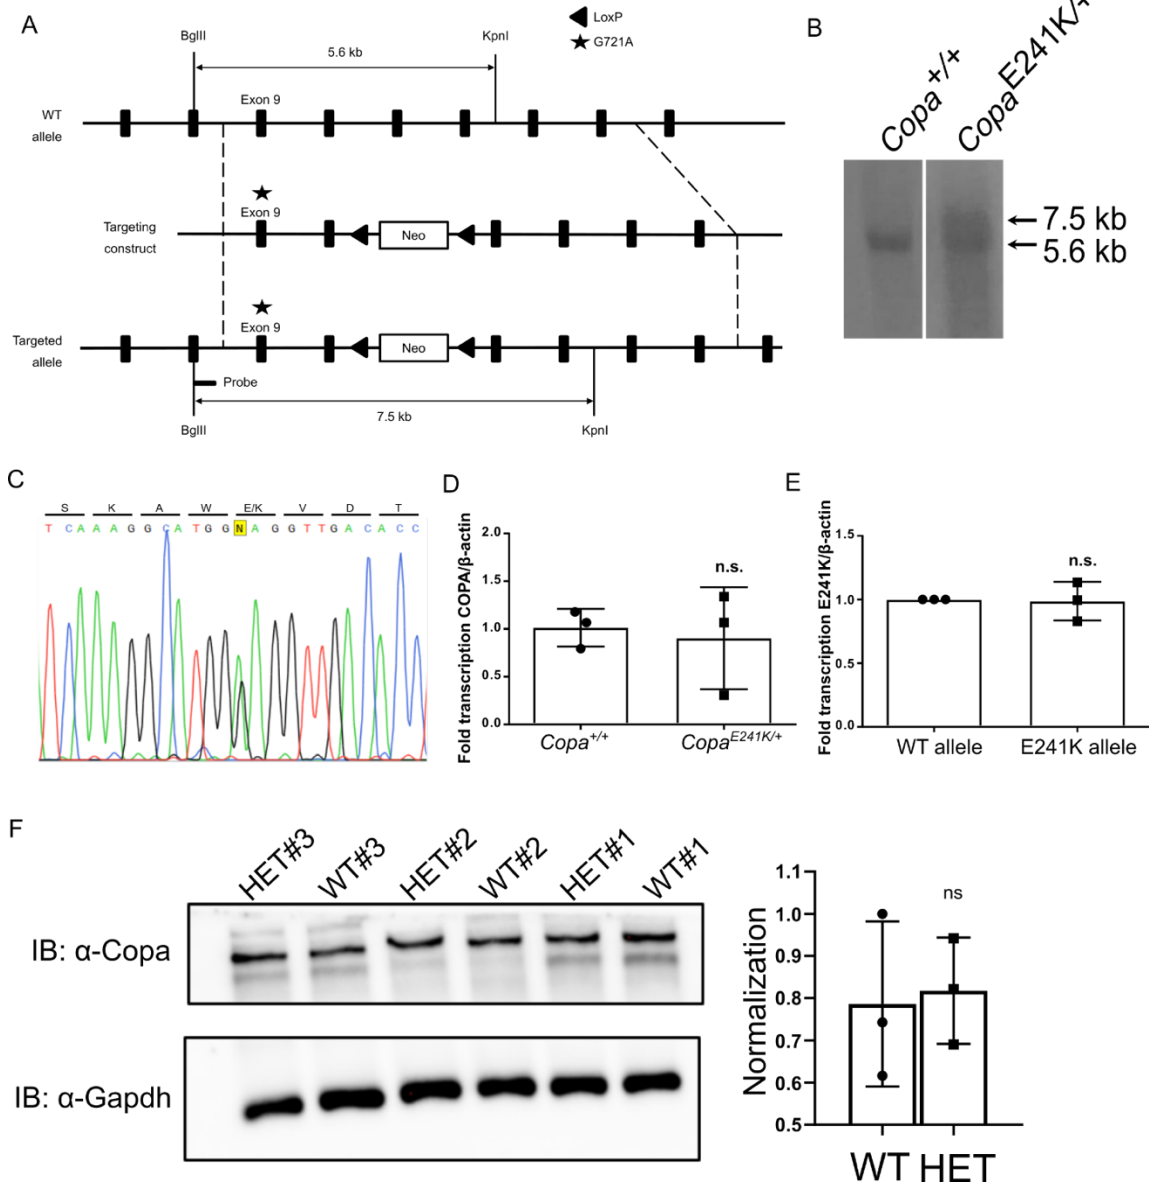

**Fig. S1. Schematic for generation of *Copa*<sup>E241K/+</sup> mice and validation of gene targeting.** **A)** Schematic of the targeting vector used to knock-in the E241K mutation into exon 9 of the *Copa* gene. The Neomycin cassette is flanked by LoxP sites. The dashed lines indicate the ends of the targeting construct's homology. **B)** Southern blot of genomic DNA from ES cells targeted with the E241K/G721A knock-in construct and digested with BglII and KpnI. **C)** The presence of the mutation was confirmed by Sanger sequencing in ES cells that were positive by Southern blot. **D)** Real time PCR measurement of total *Copa* mRNA level in WT and *Copa*<sup>E241K/+</sup> mice (WT,  $n = 3$ ; HET,  $n = 3$ ). **E)** mRNA level of wild type *Copa* and *Copa*<sup>E241K</sup> alleles in heterozygous *Copa*<sup>E241K/+</sup> mice ( $n = 3$ ). **F)** left: Western blot showing the Copa protein level in the thymocytes from indicated mice (WT,  $n = 3$ ; HET,  $n = 3$ ). right: Quantification of the western blot. Data are mean  $\pm$  SD. Unpaired, parametric, two-tailed Student's  $t$ -test was used for statistical analysis.  $p < 0.05$  is considered statistically significant. ns: not significant.

## Supplemental Figure 2

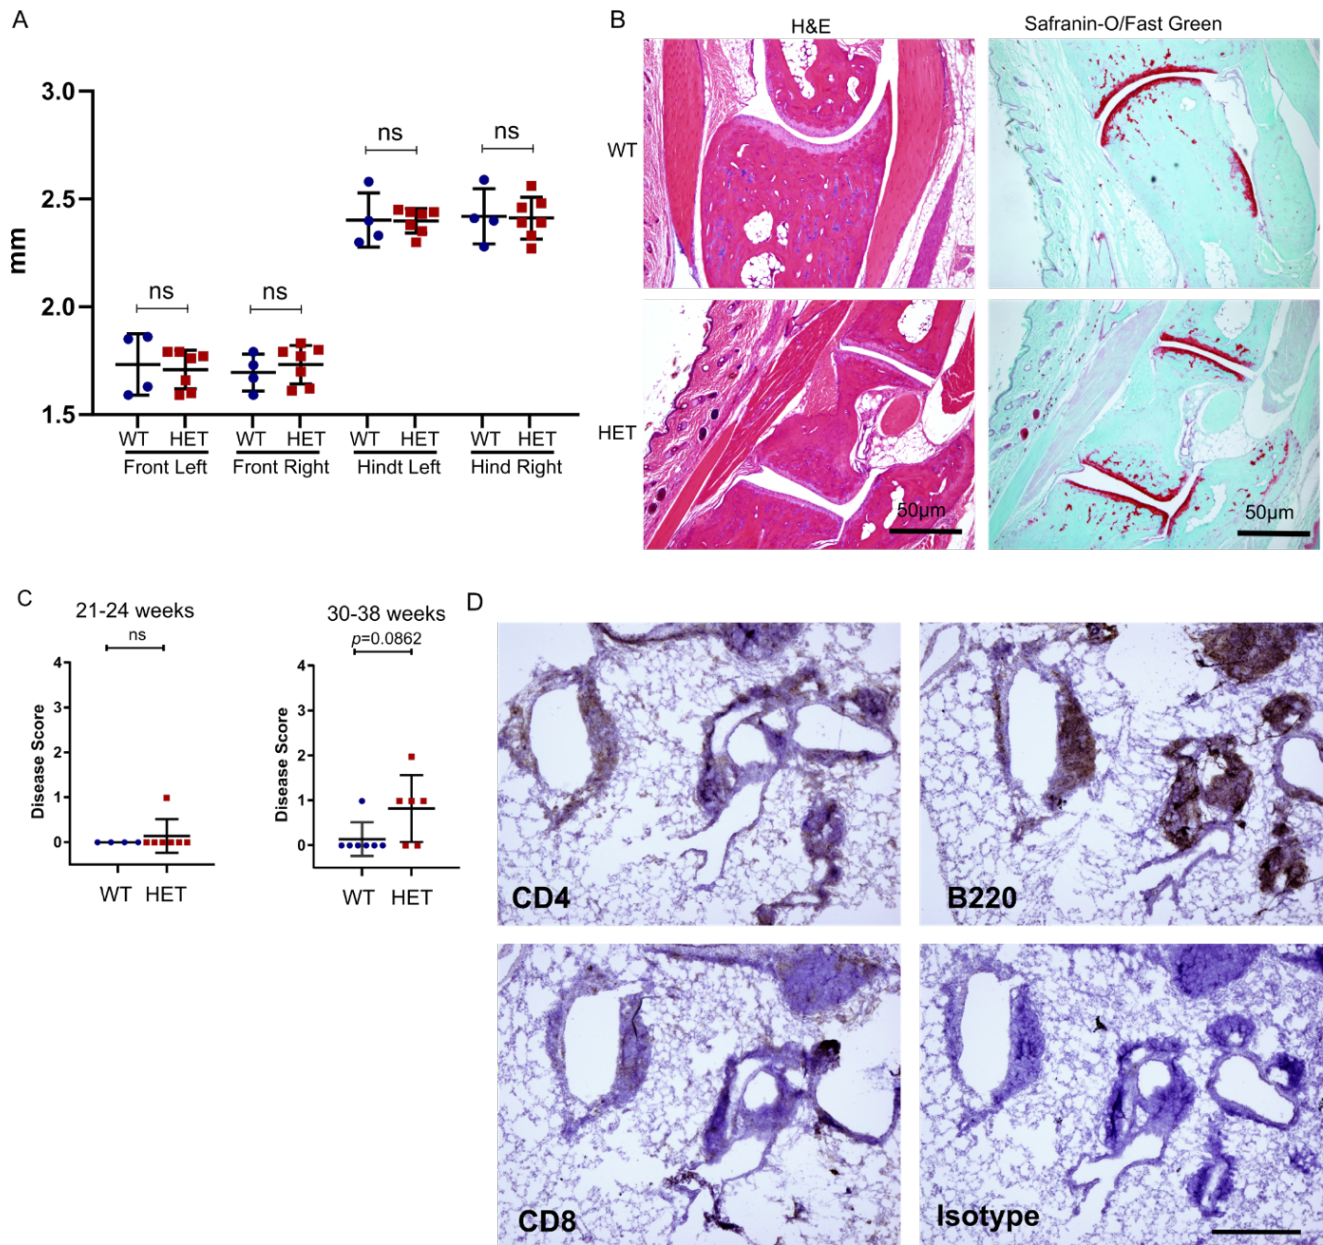

**Fig. S2: *Copa*<sup>E241K/+</sup> mice develop lymphocytic infiltration of lung but no joint disease.** **A)** Ankle thickness of the wild type and *Copa*<sup>E241K/+</sup> mice (6-month-old litter mates: WT, *n* = 4; HET, *n* = 7). **B)** left: H&E staining of the ankle sections of the hind legs. right: Safranin-O/Fast green staining of the ankle sections of the hind legs. **C)** Disease scores of lung sections from the 5-6-month-old (Littermates: WT, *n* = 4; HET, *n* = 7) and 7-9-month-old (Littermates: WT, *n* = 7; HET, *n* = 6) mice. **D)** Representative image of the IHC staining of the lung section from *Copa*<sup>E241K/+</sup> mice. Data are mean ± SD. Unpaired, parametric, two-tailed Student's *t*-test was used for statistical analysis in A. *p* < 0.05 is considered statistically significant. ns: not significant. B and D taken at 4x magnification, scale bar = 50µm.

### Supplemental Figure 3

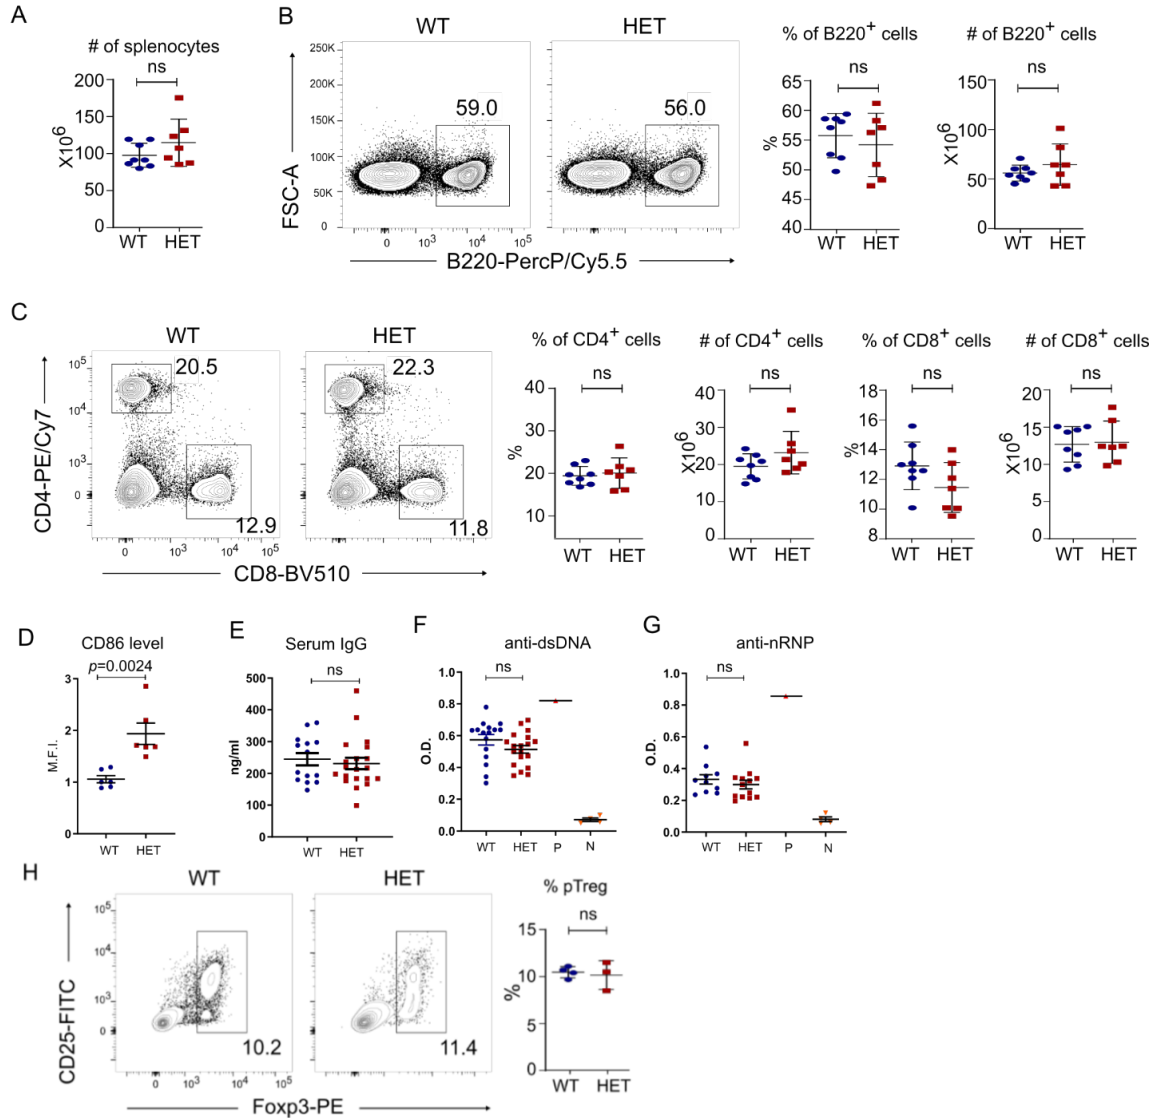

**Fig. S3: *Copa*<sup>E241K/+</sup> mice have normal percentages of splenic B and T cells and no autoantibodies.**

**A)** Cell counts of splenocytes (3-month-old littermates: WT,  $n = 8$ ; HET,  $n = 7$ ). **B)** left: Representative flow plots showing percentage of B cells based on B220 expression. right: Percentage and cell counts of B220<sup>+</sup> cells among splenocytes (3-month-old littermates: WT,  $n = 8$ ; HET,  $n = 7$ ). **C)** left: Representative flow plots showing the percentages of CD4<sup>+</sup> and CD8<sup>+</sup> T cells. right: Percentages and cell counts of CD4<sup>+</sup> and CD8<sup>+</sup> T cells among splenocytes (3-month-old littermates: WT,  $n = 8$ ; HET,  $n = 7$ ). **D)** Quantification of the M.F.I. of CD86 on B cells. (3-month-old littermates: WT,  $n = 6$ ; HET,  $n = 6$ ) **E)** Measurement of serum IgG level by Elisa (9-10-month-old littermates: WT,  $n = 14$ ; HET,  $n = 20$ ) **F)** Serum anti-dsDNA IgG level by Elisa (9-10-month-old littermates: WT,  $n = 16$ ; HET,  $n = 19$ ). P: serum from a Lyn knock out mouse. N: PBS. **G)** Serum anti-nRNP IgG level by Elisa (9-10-month-old littermates: WT,  $n = 10$ ; HET,  $n = 13$ ). P: serum from a Lyn knock out mouse. N: PBS. **H)** left: Intracellular Fopx3 in total splenic CD4<sup>+</sup> T cells (gated on CD4<sup>+</sup>TCR $\beta$ <sup>+</sup>). right: Percentages of Fopx3<sup>+</sup> CD4<sup>+</sup> T cells among total splenic CD4<sup>+</sup> T cells. Data are mean  $\pm$  SD. Unpaired, parametric, two-tailed Student's  $t$ -test was used for statistical analysis.  $p < 0.05$  is considered statistically significant. ns: not significant.

## Supplemental Figure 4

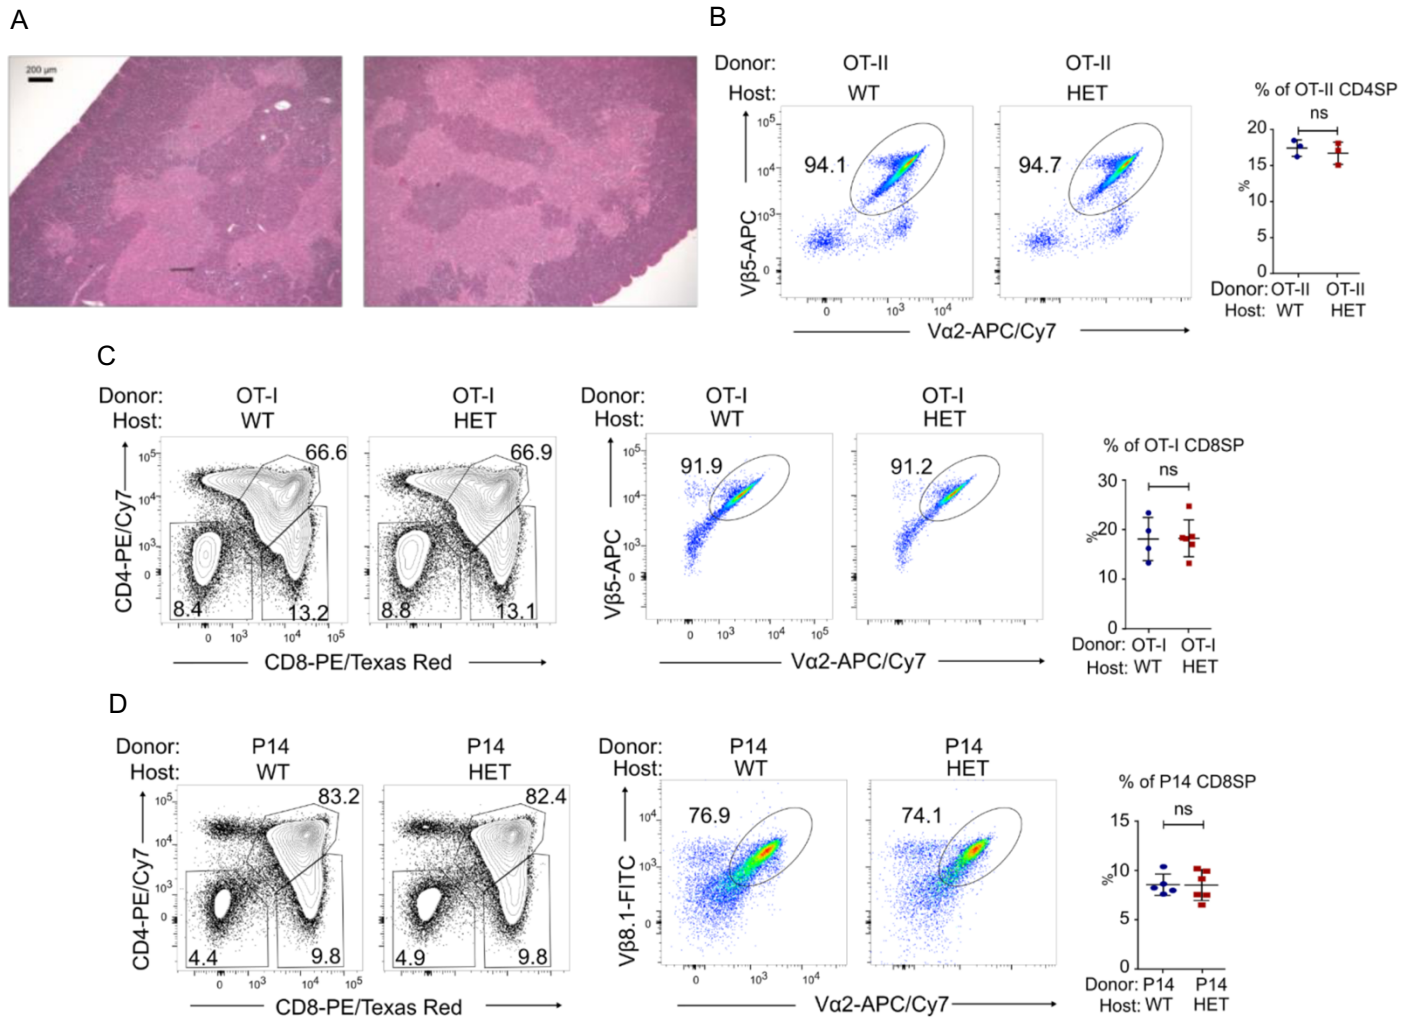

**Fig. S4. Mutant *Copa* in thymic stroma causes an increase in SP thymocytes despite apparent normal positive selection in *Copa*<sup>E241K/+</sup> mice.** **A)** Representative H&E staining of thymic architecture in WT and *Copa*<sup>E241/+</sup> littermates ( $n = 3$  per genotype). **B)** left: Representative flow plots of  $V\alpha 2$  and  $V\beta 5$  on OT-II CD4SP thymocytes in WT and HET hosts. right: Percentages of OT-II CD4SP in the indicated hosts (WT,  $n = 3$ ; HET,  $n = 3$ ). **C)** left: Representative CD4 versus CD8 flow plots of OT-I thymocytes in WT and HET hosts. middle: Flow cytometric measurement of  $V\alpha 2$  and  $V\beta 5$  on CD8SP thymocytes. right: Percentage of CD8SP in the indicated hosts (WT,  $n = 4$ ; HET,  $n = 5$ ). **D)** left: Representative CD4 versus CD8 flow plots of P14 thymocytes in WT and HET hosts. middle: Flow cytometric measurement of  $V\alpha 2$  and  $V\beta 8.1$  on CD8SP thymocytes. right: Percentage of CD8SP in the indicated hosts (WT,  $n = 5$ ; HET,  $n = 5$ ). Data are mean  $\pm$  SD. Unpaired, parametric, two-tailed Student's  $t$ -test was used for statistical analysis.  $p < 0.05$  is considered statistically significant. ns: not significant.
